# Supplementary material for: Effects of bowel cleansing on the intestinal microbiota
Source: HighWire-hosted journal article supplement (doi:10.1136/gutjnl-2014-307240), 2014-12-19
Supplement: gutjnl-2014-307240supp_figure1.pdf [file gutjnl-2014-307240supp_figure1.pdf]

Figure S1

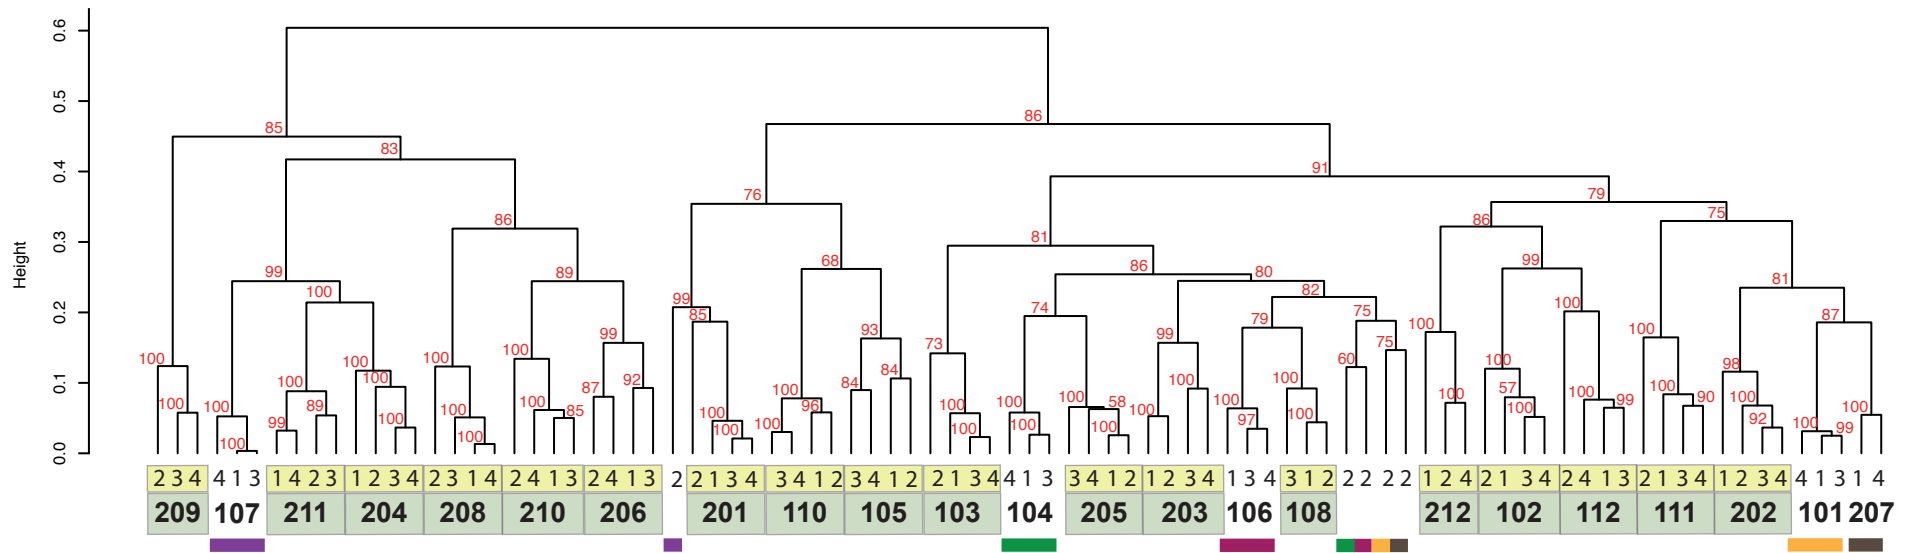

Figure S1: Clustering dendrogram with approximately unbiased (au) p-values, estimating the confidence of the obtained cluster. Here the au-values indicate the percentage of which the bootstrapping iterations resulted into this clustering
