# Supplementary material for: Effects of bowel cleansing on the intestinal microbiota
Source: HighWire-hosted journal article supplement (doi:10.1136/gutjnl-2014-307240), 2014-12-19
Supplement: gutjnl-2014-307240supp_figure2.pdf [file gutjnl-2014-307240supp_figure2.pdf]

Figure S2

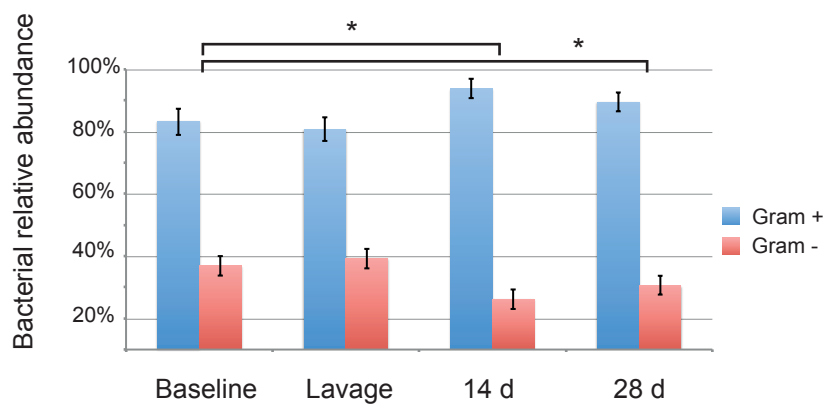

Figure S2: Mean relative abundance of Gram-positive and Gram-negative bacteria calculated from the HITChip microbiota profiles of all individual per each time point. Statistical significance of the differences between the time points is indicated with an asterisk. SEM is indicated by the error bars
