# Supplementary material for: Effects of bowel cleansing on the intestinal microbiota
Source: HighWire-hosted journal article supplement (doi:10.1136/gutjnl-2014-307240), 2014-12-19
Supplement: gutjnl-2014-307240supp_figure3.pdf [file gutjnl-2014-307240supp_figure3.pdf]

Figure S3

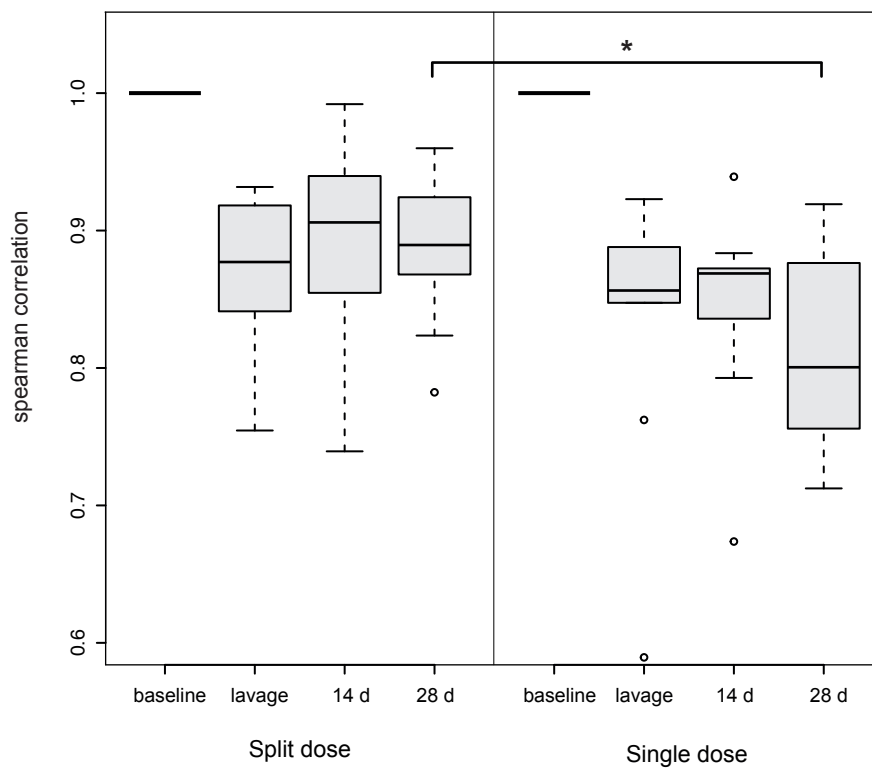

Figure S3: The microbial recovery of the Proteobacteria phylum calculated as correlation of the microbial profile against the baseline sample, in the two dosing groups. Statistical significance indicated with an asterisk.
