# Supplementary material for: Effects of bowel cleansing on the intestinal microbiota
Source: HighWire-hosted journal article supplement (doi:10.1136/gutjnl-2014-307240), 2014-12-19
Supplement: gutjnl-2014-307240supp_figure4.pdf [file gutjnl-2014-307240supp_figure4.pdf]

Figure S4

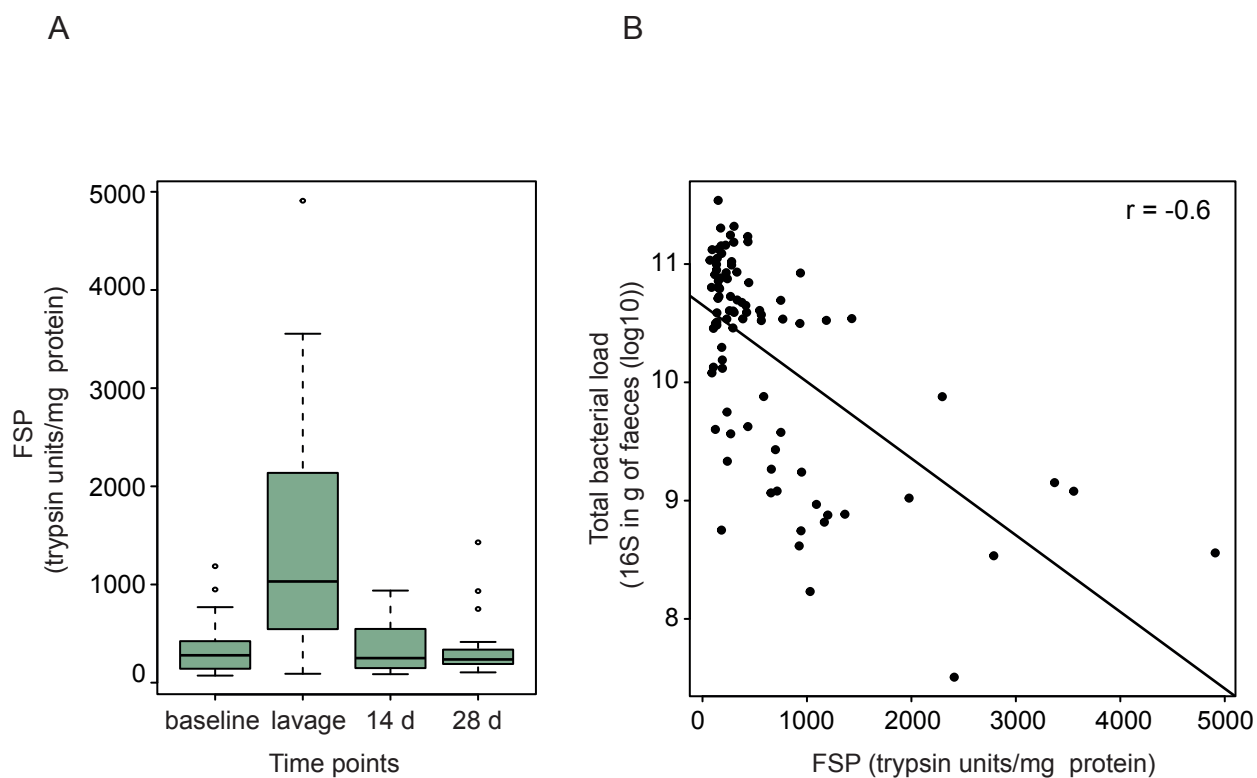

Figure S4: A) Alteration on the faecal serine protease (FSP) levels measured through out the trial (original publication Tooth *et al.*, 2013) B) Correlation between the total bacterial load and the FSP
