# Supplementary material for: Effects of bowel cleansing on the intestinal microbiota
Source: HighWire-hosted journal article supplement (doi:10.1136/gutjnl-2014-307240), 2014-12-19
Supplement: gutjnl-2014-307240supp_figure5.pdf [file gutjnl-2014-307240supp_figure5.pdf]

Figure S5

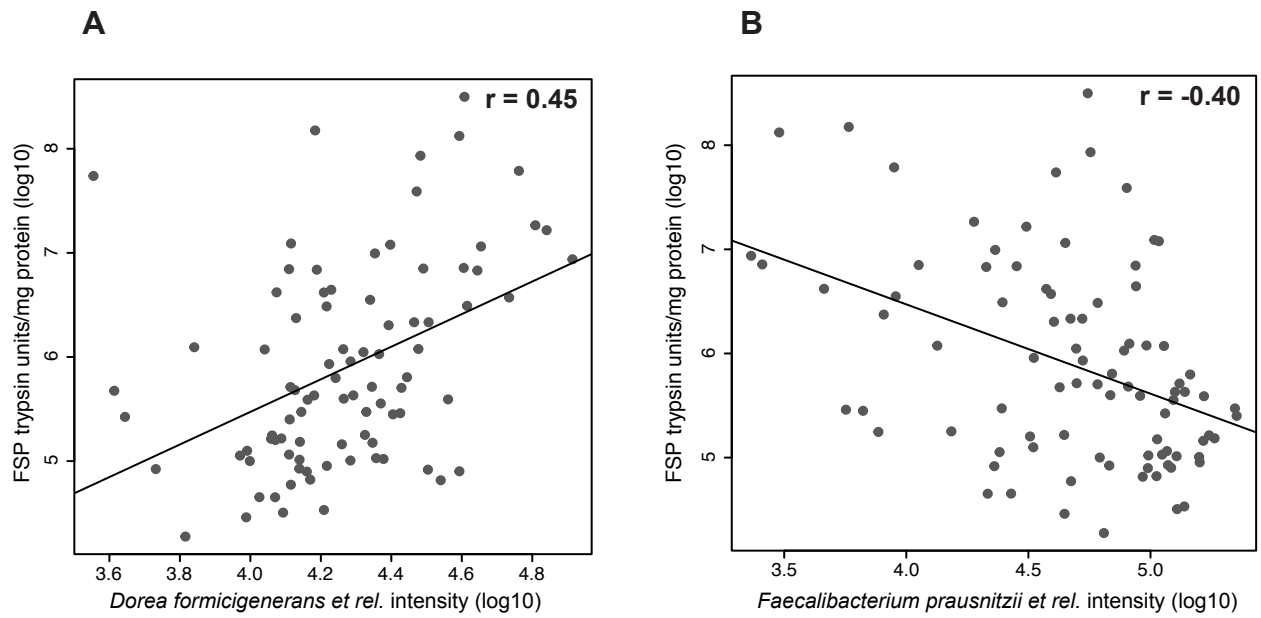

Figure S5: Correlations between faecal serine protease (FSP) amounts and bacterial abundance.
