# Supplementary material for: Effects of bowel cleansing on the intestinal microbiota
Source: HighWire-hosted journal article supplement (doi:10.1136/gutjnl-2014-307240), 2014-12-19
Supplement: gutjnl-2014-307240supp_supp.pdf [file gutjnl-2014-307240supp_supp.pdf]

## **Supplementary material:**

### **Subject information**

The recruited healthy volunteers (n=24) were chosen with the following inclusion criteria: male and female of 18-65 years of age both with a normal Body Mass Index (18-28 kg/m<sup>2</sup>). The exclusion criteria included, pregnancy, history of serious acute or chronic illness especially gastrointestinal, use of medication which is known to affect gastrointestinal transit, such as opiates and constipating drugs, substance abuse and the use of antibiotics 3 months prior the experiment. Subjects were age and gender matched and divided into the two study groups.

### **Predicting the functional potential of the intestinal microbiota**

We employed the PICRUSt pipeline<sup>21</sup> to estimate the gene contents of the HITChip target species in order to study possible functional differences of the microbiota between different sample groups. The PICRUSt pipeline estimates gene contents using phylogenetic marker gene sequences by mapping the marker sequences to a phylogeny where the gene contents of target species are available. This approach allows estimating the gene contents of unknown genomes based on their phylogenetic position.

Here we have used the 16S rRNA genes targeted by the HITChip as an input to PICRUSt, where the 16S sequences are first mapped to the reference phylogeny, and the hits are then divided by 16S copy number of each corresponding reference genome to normalize for copy number variations. These normalized counts are multiplied by the gene content (i.e. KEGG orthologs) of the reference genome(s) to estimate the gene content of the unknown query genome.

To transform the HITChip data to PICRUSt format, a QIIME<sup>23</sup> formatted fasta file was constructed from the HITChip data using in-house scripts by multiplying the HITChip target sequences by normalized intensities (where the lowest intensity value was 1) for each sample and giving each sequence a unique identifier consisting of sample name and sequence ID (e.g. "> sample1\_sequence1"). The intensity values of each HITChip target

sequence were thereafter interpreted as counts. OTUs were picked from the fasta file at 0.97 threshold using the pick\_closed\_reference\_otus.py QIIME script<sup>23</sup> with Greengenes version 13\_5<sup>22</sup> reference OTUs. The resulting biom-formatted OTU table was input to PICRUSt<sup>21</sup> version 1.0.0 running in Galaxy

([http://huttenhower.sph.harvard.edu/galaxy/root?tool\\_id=PICRUSt\\_normalize](http://huttenhower.sph.harvard.edu/galaxy/root?tool_id=PICRUSt_normalize)).

KEGG ortholog (KO)<sup>24</sup> mappings of PICRUSt were used in further analysis, where the KO's having count number less than 13000 summed over all samples were removed to exclude background from analysis. P-values for remaining KO's in sample groupings were computed with Wilcoxon's rank sum test and Benjamini-Hochberg false discovery rate correction.

### **References:**

- 1 Connor A, Tolan D, Hughes S, Carr N, Tomson C. Consensus guidelines for the safe prescription and administration of oral bowel-cleansing agents. *Gut* 2012;61:1525-32.
- 2 Strocchi A, Bond JH, Ellis C, Levitt MD. Colonic Concentrations of Hydrogen and Methane Following Colonoscopic Preparation with an Oral Lavage Solution. *Gastrointest Endosc* 1990;36:580-2.
- 3 Jalanka-Tuovinen J, Salonen A, Nikkilä J, Immonen O, Kekkonen R, Lahti L, et al. Intestinal microbiota in healthy adults: temporal analysis reveals individual and common core and relation to intestinal symptoms. *PLoS ONE* 2011;6:e23035.
- 4 Zoetendal EG, Akkermans AD, De Vos WM. Temperature gradient gel electrophoresis analysis of 16S rRNA from human fecal samples reveals stable and host-specific communities of active bacteria. *Applied and Environmental Microbiology* 1998;64:3854-9.
- 5 Rajilic-Stojanovic M, Heilig HG, Tims S, Zoetendal EG, de Vos WM. Long-term monitoring of the human intestinal microbiota composition. *Environ Microbiol* 2012;15:1146-1159.
- 6 Jernberg C, Lofmark S, Edlund C, Jansson JK. Long-term impacts of antibiotic exposure on the human intestinal microbiota. *Microbiology* 2010;156:3216-23.
- 7 Kamada N, Chen GY, Inohara N, Nunez G. Control of pathogens and pathobionts by the gut microbiota. *Nat Immunol* 2013;14:685-90.
- 8 Lahti L, Salojarvi J, Salonen A, Scheffer M, de Vos WM. Tipping elements in the human intestinal ecosystem. *Nature communications* 2014;5:4344.
- 9 Mai V, Greenwald B, Morris JG, Jr., Raufman JP, Stine OC. Effect of bowel preparation and colonoscopy on post-procedure intestinal microbiota composition. *Gut* 2006;55:1822-3.
- 10 Harrell L, Wang YW, Antonopoulos D, Young V, Lichtenstein L, Huang Y, et al. Standard Colonic Lavage Alters the Natural State of Mucosal-Associated Microbiota in the Human Colon. *PLoS ONE* 2012;7:e32545.

- 11 O'Brien CL, Allison GE, Grimpen F, Pavli P. Impact of colonoscopy bowel preparation on intestinal microbiota. *PLoS ONE* 2013;8:e62815.
- 12 Gorkiewicz G, Thallinger GG, Trajanoski S, Lackner S, Stocker G, Hinterleitner T, et al. Alterations in the colonic microbiota in response to osmotic diarrhea. *PLoS ONE* 2013;8:e55817.
- 13 Johansson ME, Gustafsson JK, Holmen-Larsson J, Jabbar KS, Xia L, Xu H, et al. Bacteria penetrate the normally impenetrable inner colon mucus layer in both murine colitis models and patients with ulcerative colitis. *Gut* 2014;63:281-91.
- 14 Tooth D, Garsed K, Singh G, Marciani L, Lam C, Fordham I, et al. Characterisation of faecal protease activity in irritable bowel syndrome with diarrhoea: origin and effect of gut transit. *Gut* 2014;63:753-60.
- 15 Garsed KC, Marciani L, Fields A, Fordham I, Pritchard SE, Placidi E, et al. Mode of Action of a Macrogol Formulation on Distribution of Intestinal Fluid: A MRI Study. *Gastroenterology* 2012;142:S814-S.
- 16 Salonen A, Nikkilä J, Jalanka-Tuovinen J, Immonen O, Rajilic-Stojanovic M, Kekkonen RA, et al. Comparative analysis of fecal DNA extraction methods with phylogenetic microarray: effective recovery of bacterial and archaeal DNA using mechanical cell lysis. *J Microbiol Methods* 2010;81:127-34.
- 17 Rajilic-Stojanovic M, Heilig HG, Molenaar D, Kajander K, Surakka A, Smidt H, et al. Development and application of the human intestinal tract chip, a phylogenetic microarray: analysis of universally conserved phylotypes in the abundant microbiota of young and elderly adults. *Environ Microbiol* 2009;11:1736-51.
- 18 Claesson MJ, O'Sullivan O, Wang Q, Nikkilä J, Marchesi JR, Smidt H, et al. Comparative analysis of pyrosequencing and a phylogenetic microarray for exploring microbial community structures in the human distal intestine. *PLoS ONE* 2009;4:e6669.
- 19 Lahti L, Torrente A, Elo LL, Brazma A, Rung J. A fully scalable online pre-processing algorithm for short oligonucleotide microarray atlases. *Nucleic acids research* 2013;41.
- 20 Nadkarni MA, Martin FE, Jacques NA, Hunter N. Determination of bacterial load by real-time PCR using a broad-range (universal) probe and primers set. *Microbiology* 2002;148:257-66.
- 21 Ufnar JA, Wang SY, Christiansen JM, Yampara-Iquise H, Carson CA, Ellender RD. Detection of the *nifH* gene of *Methanobrevibacter smithii*: a potential tool to identify sewage pollution in recreational waters. *J Appl Microbiol* 2006;101:44-52.
- 22 Heid CA, Stevens J, Livak KJ, Williams PM. Real time quantitative PCR. *Genome research* 1996;6:986-94.
- 23 Roka R, Rosztoczy A, Leveque M, Izbeki F, Nagy F, Molnar T, et al. A pilot study of fecal serine-protease activity: a pathophysiologic factor in diarrhea-predominant irritable bowel syndrome. *Clinical gastroenterology and hepatology : the official clinical practice journal of the American Gastroenterological Association* 2007;5:550-5.
- 24 Langille MGI, Zaneveld J, Caporaso JG, McDonald D, Knights D, Reyes JA, et al. Predictive functional profiling of microbial communities using 16S rRNA marker gene sequences. *Nat Biotechnol* 2013;31:814-21.

- 25 McDonald D, Price MN, Goodrich J, Nawrocki EP, DeSantis TZ, Probst A, et al. An improved Greengenes taxonomy with explicit ranks for ecological and evolutionary analyses of bacteria and archaea. *ISME J* 2012;6:610-8.
- 26 Caporaso JG, Kuczynski J, Stombaugh J, Bittinger K, Bushman FD, Costello EK, et al. QIIME allows analysis of high-throughput community sequencing data. *Nature methods* 2010;7:335-6.
- 27 Kanehisa M, Goto S. KEGG: Kyoto Encyclopedia of Genes and Genomes. *Nucleic acids research* 2000;28:27-30.
- 28 Huttenhower C, Gevers D, Knight R, Abubucker S, Badger JH, Chinwalla AT, et al. Structure, function and diversity of the healthy human microbiome. *Nature* 2012;486:207-14.
- 29 Pop M, Walker AW, Paulson J, Lindsay B, Antonio M, Hossain MA, et al. Diarrhea in young children from low-income countries leads to large-scale alterations in intestinal microbiota composition. *Genome Biology* 2014;15:R76.
- 30 Cohen LB. Split dosing of bowel preparations for colonoscopy: an analysis of its efficacy, safety, and tolerability. *Gastrointest Endosc* 2010;72:406-12.
- 31 Nomura T, Ohkusa T, Okayasu I, Yoshida T, Sakamoto M, Hayashi H, et al. Mucosa-associated bacteria in ulcerative colitis before and after antibiotic combination therapy. *Alimentary Pharmacology & Therapeutics* 2005;21:1017-27.
- 32 Raman M, Ahmed I, Gillevet PM, Probert CS, Ratcliffe NM, Smith S, et al. Fecal Microbiome and Volatile Organic Compound Metabolome in Obese Humans With Nonalcoholic Fatty Liver Disease. *Clin Gastroenterol H* 2013;11:868-75.
- 33 Le Chatelier E, Nielsen T, Qin J, Prifti E, Hildebrand F, Falony G, et al. Richness of human gut microbiome correlates with metabolic markers. *Nature* 2013;500:541-6.
- 34 Rajilic-Stojanovic M, Biagi E, Heilig HG, Kajander K, Kekkonen RA, Tims S, et al. Global and deep molecular analysis of microbiota signatures in fecal samples from patients with irritable bowel syndrome. *Gastroenterology* 2011;141:1792-801.
- 35 Gecse K, Roka R, Ferrier L, Leveque M, Eutamene H, Cartier C, et al. Increased faecal serine protease activity in diarrhoeic IBS patients: a colonic luminal factor impairing colonic permeability and sensitivity. *Gut* 2008;57:591-9.
- 36 Bohe M, Borgstrom A, Genell S, Ohlsson K. Determination of Immunoreactive Trypsin, Pancreatic Elastase and Chymotrypsin in Extracts of Human Feces and Ileostomy Drainage. *Digestion* 1983;27:8-15.
- 37 Genell S, Gustafsson BE. Impaired Enteric Degradation of Pancreatic Endopeptidases in Antibiotic-Treated Rats. *Scandinavian journal of gastroenterology* 1977;12:801-9.
- 38 Carroll IM, Ringel-Kulka T, Ferrier L, Wu MC, Siddle JP, Bueno L, et al. Fecal Protease Activity Is Associated with Compositional Alterations in the Intestinal Microbiota. *PLoS ONE* 2013;8:e78017.
