# Supplementary material for: Effects of bowel cleansing on the intestinal microbiota
Source: HighWire-hosted journal article supplement (doi:10.1136/gutjnl-2014-307240), 2014-12-19
Supplement: gutjnl-2014-307240supp_tables.pdf [file gutjnl-2014-307240supp_tables.pdf]

Table S1: The qPCR analysis details

|                   | Universal                                | Methanobrevibacter genus   | Human b-actin              |                           |
|-------------------|------------------------------------------|----------------------------|----------------------------|---------------------------|
| Primers           | Forward                                  | TCCTACGGGAGGCAGCAGT        | TGGGAAACTGGGGATAAATACTG    | TCACCCACACTGTGCCCATCTACGA |
|                   | Reverse                                  | GGACTACCAGGGTATCTAATCCTGTT | AATGAAAAGCCATCCCGTTAAG     | CAGCGGAACCGCTCATTGCCAATGG |
| Assay conditions  | PCR product (bp)                         | 466                        | 282                        | 259                       |
|                   | MgCl <sub>2</sub> (mM)                   | 3                          | 3                          | 3                         |
|                   | Detection temp.(°C)                      | 82                         | 86                         | 88                        |
|                   | Annealing temp (°C)                      | 50                         | 54                         | 56                        |
|                   | amount of tempate (ng)                   | 0.5                        | 25                         | 25                        |
|                   | Standard                                 | <i>B. Longum</i> 16S gene  | <i>M. smithii</i> 16S gene | Human genomic DNA         |
| Average detection | CT value of the 10 <sup>7</sup> standard | 13.01                      | 15.5                       | 17.67                     |
|                   | RSq                                      | 0.998                      | 0.998                      | 0.998                     |
|                   | Slope                                    | -3.704                     | -3.499                     | -3.465                    |
|                   | Efficiency %                             | 86.44                      | 93.1                       | 94.82                     |
|                   | Reference                                | Nadkarni et al., 2003      | Ufnaret al., 2006          | Heid et al., 1996         |

Table S2: Significant correlations between the bacterial abundances and FSP activity

| <b>Phylum/Firmicute class</b> | <b>Genus-like group</b>                      | <b>Correlation with FSP activity</b> |
|-------------------------------|----------------------------------------------|--------------------------------------|
| Bacilli                       | <i>Gemella</i>                               | 0.30                                 |
|                               | <i>Lactobacillus plantarum et rel.</i>       | -0.29                                |
|                               | <i>Weissella et rel.</i>                     | -0.31                                |
| Clostridium cluster III       | <i>Clostridium thermocellum et rel.</i>      | -0.30                                |
| Clostridium cluster IV        | <i>Anaerotruncus colihominis et rel.</i>     | -0.31                                |
|                               | <i>Clostridium leptum et rel.</i>            | -0.31                                |
|                               | <i>Eubacterium siraeum et rel.</i>           | -0.32                                |
|                               | <i>Faecalibacterium prausnitzii et rel.</i>  | -0.40                                |
| Clostridium cluster IV        | <i>Ruminococcus callidus et rel.</i>         | -0.40                                |
| Clostridium cluster IX        | <i>Phascolarctobacterium faecium et rel.</i> | -0.37                                |
| Clostridium cluster XIVa      | <i>Clostridium sphenoides et rel.</i>        | 0.30                                 |
|                               | <i>Dorea formicigenerans et rel.</i>         | 0.45                                 |
|                               | <i>Eubacterium ventriosum et rel.</i>        | -0.31                                |
|                               | <i>Lachnobacillus bovis et rel.</i>          | -0.34                                |
| Uncultured Mollicutes         | Uncultured <i>Mollicutes</i>                 | -0.35                                |

*et rel.* = and relatives
